# Supplementary material
Source: MDPI journal article supplement (https://www.mdpi.com/1999-4907/10/5/447)
Supplement: s1 [file s1]

**Table S1.** Summary/Result Panel - Cost Calculator

|    | A                                                                                                                              | B                                | C            | D                  | E            |
|----|--------------------------------------------------------------------------------------------------------------------------------|----------------------------------|--------------|--------------------|--------------|
| 1  |                                                                                                                                | Base Year                        |              | Future Predictions |              |
| 2  |                                                                                                                                | Summer                           | Winter       | Summer             | Winter       |
| 3  | Hours/Day                                                                                                                      | 21                               | 19           | 21                 | 19           |
| 4  | Total Days                                                                                                                     | 214                              | 151          | 214                | 151          |
| 5  | Breakup/prepare (May/November)                                                                                                 | 61                               | 30           | 61                 | 30           |
| 6  | Shutdown Days for Hauling                                                                                                      | 10                               | 12           | 10                 | 23           |
| 7  | Shutdown Days for Harvesting                                                                                                   | 10                               | 9            | 10                 | 17.25        |
| 8  | Harvest Volume (m <sup>3</sup> )                                                                                               | 750,000                          | 1,400,000    | 750,000            | 1,400,000    |
| 9  | Access Road (km)                                                                                                               | 300.00                           | 600.00       | 300.00             | 600.00       |
| 10 | Eligible Logging Days                                                                                                          | 153                              | 121          | 153                | 121          |
| 11 | Holidays/Sundays                                                                                                               | 37                               | 29           | 37                 | 29           |
| 12 | Operation Days                                                                                                                 | 106                              | 83           | 106                | 75           |
| 13 | Hauling Operation Days                                                                                                         | 106                              | 80           | 106                | 69           |
| 14 |                                                                                                                                | Unit Prices (\$/m <sup>3</sup> ) |              |                    |              |
| 15 | Felling (\$/m <sup>3</sup> )                                                                                                   | 3.12                             | 3.10         | 3.20               | 3.19         |
| 16 | Skidding (\$/m <sup>3</sup> )                                                                                                  | 3.09                             | 3.08         | 3.15               | 3.14         |
| 17 | Delimbing (\$/m <sup>3</sup> )                                                                                                 | 4.21                             | 4.25         | 4.35               | 4.38         |
| 18 | Loading (\$/m <sup>3</sup> )                                                                                                   | 2.02                             | 2.03         | 2.15               | 2.16         |
| 19 | Hauling (\$/m <sup>3</sup> )                                                                                                   | 8.20                             | 6.11         | 8.30               | 6.21         |
| 20 | Decompaction Cost (\$/km) [36]                                                                                                 | 1,143.00                         | 0.00         | 1,143.00           | 0.00         |
| 21 | Clearing/Pilling (\$/km)                                                                                                       | 3,557.05                         | 2,124.04     | 3,557.05           | 2,124.04     |
| 22 | Seedling/Planting Cost (\$/ha) [37]                                                                                            | 1078.00                          | 0.00         | 1078.00            | 0.00         |
| 23 |                                                                                                                                | Total Costs (\$)                 |              |                    |              |
| 24 | Harvesting Cost (\$)                                                                                                           | 7,817,311                        | 14,608,495   | 8,027,436          | 15,000,729   |
| 25 | RoadBuilding Cost (\$)                                                                                                         | 1,067,114                        | 1,274,423    | 1,067,114          | 1,274,423    |
| 26 | Decompaction Cost (\$)                                                                                                         | 342,900                          | 0            | 342,900            | 0            |
| 27 | Planting Cost (\$)¹                                                                                                            | 258,720                          | 0            | 258,720            | 0            |
| 28 | Hauling Cost (\$)                                                                                                              | 6,148,686                        | 8,558,005    | 6,222,630          | 8,690,791    |
| 29 | Loading Cost (\$)                                                                                                              | 1,516,351                        | 2,846,919    | 1,609,304          | 3,020,433    |
| 30 | Total Seasonal Costs (\$)                                                                                                      | 17,151,081                       | 27,287,842   | 17,528,105         | 27,986,376   |
| 31 | <b>Total Annual Cost (\$)</b>                                                                                                  | <b>44,438,923</b>                |              | <b>45,514,480</b>  |              |
| 32 | Idle Cost (\$) - Hauling                                                                                                       | 308,570                          |              | 388,740            |              |
| 33 | Idle Cost (\$) - Loading                                                                                                       | 468,691                          |              | 624,921            |              |
| 34 | Idle Cost (\$) - Harvesting                                                                                                    | 2,337,490                        |              | 2,690,654          |              |
| 35 | <b>Idle Cost (\$) - Total</b>                                                                                                  | <b>3,114,751</b>                 |              | <b>3,704,315</b>   |              |
| 36 | <b>Total Costs of Harvesting &amp; Hauling (\$/m<sup>3</sup>)</b>                                                              | <b>20.64</b>                     | <b>18.58</b> | <b>21.15</b>       | <b>19.08</b> |
| 37 | <b>Total Unit Costs of Logging (\$/m<sup>3</sup>)</b>                                                                          | <b>22.87</b>                     | <b>19.49</b> | <b>23.37</b>       | <b>19.99</b> |
| 38 |                                                                                                                                | Number of Machines               |              |                    |              |
| 39 | Felling                                                                                                                        | 7                                | 19           | 7                  | 21           |
| 40 | Skidding                                                                                                                       | 9                                | 24           | 9                  | 26           |
| 41 | Delimbing                                                                                                                      | 14                               | 37           | 14                 | 41           |
| 42 | Loading                                                                                                                        | 5                                | 11           | 5                  | 13           |
| 43 | Hauling                                                                                                                        | 21                               | 45           | 21                 | 51           |
| 44 | Excavator                                                                                                                      | 3                                | 5            | 3                  | 5            |
| 45 | ¹ 8 meter wide, 1 km length of the road is 0.8 hectare. This conversion was used for seedling and planting of the access road. |                                  |              |                    |              |
