# Supplementary material
Source: MDPI journal article supplement (https://www.mdpi.com/1999-4907/10/5/447)
Supplement: s1 [file s1]

**Table S6.** Cost calculation for hauling truck (20 tons) - Hauling directly to mill

|    | A                                                                                                      | B                    | C           |
|----|--------------------------------------------------------------------------------------------------------|----------------------|-------------|
| 1  | 20 tons Truck                                                                                          | <b>Hauling Truck</b> |             |
| 2  | Time                                                                                                   | <b>Base Year</b>     |             |
| 3  | <b>Production</b>                                                                                      | Non-Frozen           | Frozen      |
| 4  | Annual Production (m <sup>3</sup> )                                                                    | 750,000              | 1,400,000   |
| 5  | Days                                                                                                   | 106                  | 80          |
| 6  | Hours/Day                                                                                              | 21                   | 19          |
| 7  | <b>Input</b>                                                                                           |                      |             |
| 8  | Annual Available Hours                                                                                 | 2,226                | 1,520       |
| 9  | Utilization Percentage [42]                                                                            | 80                   | 80          |
| 10 | Annual Production Hours                                                                                | 1,781                | 1,216       |
| 11 | Expected Life (Years) [49]                                                                             | 6.00                 |             |
| 12 | <b>Purchase Information</b>                                                                            |                      |             |
| 13 | Equipment Purchase Cost (\$) [48]                                                                      | 100,000              |             |
| 14 | Salvage Value (%) [49]                                                                                 | 0.15                 |             |
| 15 | Fuel Price (\$) [41]                                                                                   | 1.00                 |             |
| 16 | Oil Lube Costs (%) [41]                                                                                | 0.12                 |             |
| 17 | Insurance Costs (%) [41]                                                                               | 0.035                |             |
| 18 | Load Factor                                                                                            | 0.25                 |             |
| 19 | Salvage Value (\$)                                                                                     | 15,000               |             |
| 20 | Rate of Return on Total Capital                                                                        | 57,500               |             |
| 21 | Average Annual Equipment Value (\$)                                                                    | 0.10                 |             |
| 22 | Fuel Consumption (lt/hr) [50]                                                                          | 26.20                | 28.00       |
| 23 | <b>Ownership Costs</b>                                                                                 |                      |             |
| 24 | Depreciation (\$/year)                                                                                 | 14,167               |             |
| 25 | Insurance (\$/year)                                                                                    | 2,013                |             |
| 26 | Return on Capital (\$/year)                                                                            | 5,750                |             |
| 27 | Annual Ownership Costs (\$/year)                                                                       | 21,929               |             |
| 28 | Total Ownership Costs (\$/year)                                                                        | 986,813              |             |
| 29 | <b>Total Ownership Unit Cost (\$/m<sup>3</sup>)</b>                                                    | 0.46                 |             |
| 30 | <b>Labor Costs</b>                                                                                     |                      |             |
| 31 | Straight Time                                                                                          | 1,908                | 1,440       |
| 32 | Overtime Worked                                                                                        | 318                  | 80          |
| 33 | Wage (\$/hr) [32]                                                                                      | 28.75                | 28.75       |
| 34 | Overtime (\$/hr)                                                                                       | 43.13                | 43.13       |
| 35 | Seasonal Labor Costs (\$)                                                                              | 68,569               | 44,850      |
| 36 | Add Employee Load (Benefits)                                                                           | 17,142               | 11,213      |
| 37 | Total Labour Costs (\$)                                                                                | 85,711               | 56,063      |
| 38 | <b>Total Labor Unit Costs (\$/m<sup>3</sup>)</b>                                                       | 2.99                 | 2.20        |
| 39 | <b>Operation Costs</b>                                                                                 |                      |             |
| 40 | Fuel cost (\$/hr)                                                                                      | 26.20                | 28.00       |
| 41 | Oil/Lube Cost (\$/hr)                                                                                  | 3.14                 | 3.36        |
| 42 | Fuel & Lube Cost (\$/m <sup>3</sup> )                                                                  | 0.07                 | 0.03        |
| 43 | Repair & Maintenance Costs (\$/year)                                                                   | 11,333               |             |
| 44 | Repair & Maintenance Costs (\$/m <sup>3</sup> )                                                        | 0.593                |             |
| 45 | Total Operation Costs (Season)                                                                         | 55,545               | 40,616      |
| 46 | <b>Total Operation Unit Costs (\$/m<sup>3</sup>)</b>                                                   | 4.75                 | 3.46        |
| 47 | <b>Total Equipment Unit Costs (seasonal) (\$/m<sup>3</sup>)<sup>1</sup></b>                            | <b>8.20</b>          | <b>6.11</b> |
| 48 | Number of trips                                                                                        | 53                   | 101         |
| 49 | Number of Equipments                                                                                   | 21                   | 45          |
| 50 | Prodcutivity (m <sup>3</sup> /Pmh) (Table S9)                                                          | 7.09                 | 10.22       |
| 51 | Availability (%)                                                                                       | 0.90                 | 0.90        |
| 52 | Productivity (m <sup>3</sup> /Smh)                                                                     | 6.38                 | 9.19        |
| 53 | <sup>1</sup> This total cost includes operation costs and transportation costs calculated in Table S9. |                      |             |
