# Supplementary material
Source: MDPI journal article supplement (https://www.mdpi.com/1999-4907/10/5/447)
Supplement: s1 [file s1]

**Table S8.** Cost calculation for excavation to build access and in-block roads

|    | A                                                    | B                | C               |
|----|------------------------------------------------------|------------------|-----------------|
| 1  |                                                      | <b>Excavator</b> |                 |
| 2  | <b>Time</b>                                          | <b>Base Year</b> |                 |
| 3  | <b>Production</b>                                    | Non-Frozen       | Frozen          |
| 4  | Total Access Road to Build (km)                      | 300.00           | 600.00          |
| 5  | Days                                                 | 106              | 83              |
| 6  | Hours/Day                                            | 21               | 19              |
| 7  | <b>Input</b>                                         |                  |                 |
| 8  | Annual Available Hours                               | 2,226            | 1,577           |
| 9  | Utilization Percentage [42]                          | 75               | 75              |
| 10 | Annual Production Hours                              | 1,670            | 1,183           |
| 11 | Expected Life (Years) [49]                           | 4.00             |                 |
| 12 | <b>Purchase Information</b>                          |                  |                 |
| 13 | Equipment Purchase Cost (\$) [47]                    | 440,000          |                 |
| 14 | Salvage Value (%) [49]                               | 0.15             |                 |
| 15 | Fuel Price (\$) [41]                                 | 1.00             |                 |
| 16 | Oil Lube Costs (%) [41]                              | 0.10             |                 |
| 17 | Insurance Costs (%) [41]                             | 0.035            |                 |
| 18 | Load Factor                                          | 0.25             |                 |
| 19 | Salvage Value (\$)                                   | 66,000           |                 |
| 20 | Rate of Return on Total Capital                      | 253,000          |                 |
| 21 | Average Annual Equipment Value (\$)                  | 0.10             |                 |
| 22 | Fuel Consumption (lt/hr) [51]                        | 41.60            | 43.00           |
| 23 | <b>Ownership Costs</b>                               |                  |                 |
| 24 | Depreciation (\$/year)                               | 93,500           |                 |
| 25 | Insurance (\$/year)                                  | 8,855            |                 |
| 26 | Return on Capital (\$/year)                          | 25,300           |                 |
| 27 | Annual Ownership Costs (\$/year)                     | 127,655          |                 |
| 28 | Total Ownership Costs (\$/year)                      | 638,275          |                 |
| 29 | <b>Total Ownership Unit Cost (\$/km)</b>             | 709.19           |                 |
| 30 | <b>Labor Costs</b>                                   |                  |                 |
| 31 | Straight Time                                        | 1,908            | 1,494           |
| 32 | Overtime Worked                                      | 318              | 83              |
| 33 | Wage (\$/hr) [32]                                    | 29.29            | 29.29           |
| 34 | Overtime (\$/hr)                                     | 43.94            | 43.94           |
| 35 | Seasonal Labor Costs (\$)                            | 69,857           | 47,406          |
| 36 | Add Employee Load (Benefits)                         | 17,464           | 11,851          |
| 37 | Total Labour Costs (\$)                              | 87,321           | 59,257          |
| 38 | <b>Total Labor Unit Costs(\$/km)</b>                 | 1,341.12         | 634.19          |
| 39 | <b>Operation Costs</b>                               |                  |                 |
| 40 | Fuel cost (\$/hr)                                    | 41.60            | 43.00           |
| 41 | Oil/Lube Cost (\$/hr)                                | 4.16             | 4.30            |
| 42 | Fuel & Lube Cost (\$/km)                             | 254.65           | 93.24           |
| 43 | Repair & Maintenance Costs (\$/year)                 | 74,800           |                 |
| 44 | Repair & Maintenance Costs (\$/km)                   | 672.434          |                 |
| 45 | Total Operation Costs (Season)                       | 98,104           | 72,942          |
| 46 | <b>Total Operation Unit Costs (\$/km)</b>            | 1,506.73         | 780.65          |
| 47 | <b>Total Equipment Unit Costs (seasonal) (\$/km)</b> | <b>3,557.05</b>  | <b>2,124.04</b> |
| 48 | Number of Equipments                                 | 3                | 5               |
| 49 | Prodcutivity (km/Pmh) <sup>1</sup>                   | 0.039            | 0.079           |
| 50 | Availability (%)                                     | 1.00             | 1.00            |
| 51 | Productivity (km/Smh)                                | 0.039            | 0.079           |
| 52 | <sup>1</sup> obtained from contractor                |                  |                 |
