# Supplementary material
Source: MDPI journal article supplement (https://www.mdpi.com/1999-4907/10/5/447)
Supplement: s1 [file s1]

**Table S9.** Hauling truck productivity - Hauling directly to mill

|    | A                                                                                                                                                                                                                          | B             | C                                     | D |
|----|----------------------------------------------------------------------------------------------------------------------------------------------------------------------------------------------------------------------------|---------------|---------------------------------------|---|
| 1  | Truck Productivity & Cost of Truck Transportation                                                                                                                                                                          |               |                                       |   |
| 2  |                                                                                                                                                                                                                            | Summer        | Winter                                |   |
| 3  | Hours/Day                                                                                                                                                                                                                  | 21            | 19                                    |   |
| 4  | Haul distance (km) <sup>1</sup>                                                                                                                                                                                            | 250           |                                       |   |
| 5  | Average speed (km/hr) (Unloaded/Loaded) [39]                                                                                                                                                                               | 85            | 55                                    |   |
| 6  | Load Size (tons)                                                                                                                                                                                                           | 27.3          | 39                                    |   |
| 7  | Load Size (m <sup>3</sup> - Aspen)                                                                                                                                                                                         | 59            | 85                                    |   |
| 8  | Undloading time (mins) [36]                                                                                                                                                                                                |               | 30                                    |   |
| 9  | Loading time (mins) [36]                                                                                                                                                                                                   |               | 20                                    |   |
| 10 | Total Trip (hr)                                                                                                                                                                                                            |               | 8                                     |   |
| 11 | Productivity (m <sup>3</sup> /truck)                                                                                                                                                                                       | 7.09          | 10.22                                 |   |
| 12 | Number of road trips in a day                                                                                                                                                                                              | 3             | 2                                     |   |
| 13 | Cost per Standing Time (\$/hr)                                                                                                                                                                                             |               | 20                                    |   |
| 14 | Cost per Truck Running Time (\$/hr)                                                                                                                                                                                        |               | 30                                    |   |
| 15 | Hauling Cost                                                                                                                                                                                                               | Summer        | Winter                                |   |
| 16 | Fixed Cost (Truck Standby for Loadingand Unloading)                                                                                                                                                                        | 0.28          | 0.20                                  |   |
| 17 | Variable Cost (Truck Travel)                                                                                                                                                                                               | 3.81          | 2.64                                  |   |
| 18 | Total Unit Cost <sup>2</sup> (without Operation Cost) (\$/m <sup>3</sup> )                                                                                                                                                 | 4.09          | 2.84                                  |   |
| 19 |                                                                                                                                                                                                                            |               |                                       |   |
| 20 |                                                                                                                                                                                                                            | Weight (tons) | Volume <sup>3</sup> (m <sup>3</sup> ) |   |
| 21 | Tare Weight of Truck                                                                                                                                                                                                       | 20.0          |                                       |   |
| 22 | Gross Vehicle Weight Summer                                                                                                                                                                                                | 47.3          |                                       |   |
| 23 | Gross Vehicle Weight Winter                                                                                                                                                                                                | 59.3          |                                       |   |
| 24 | Payload Weight Summer <sup>4</sup>                                                                                                                                                                                         | 27.3          | 59                                    |   |
| 25 | Payload Weight Winter <sup>4</sup>                                                                                                                                                                                         | 39.3          | 85                                    |   |
| 26 |                                                                                                                                                                                                                            |               |                                       |   |
| 27 | <sup>1</sup> Average hauling distance to satellite yard                                                                                                                                                                    |               |                                       |   |
| 28 | <sup>2</sup> Total unit cost in this section was calculated for based on trucks transportation                                                                                                                             |               |                                       |   |
| 29 | <sup>3</sup> Wood load size was converted from US ton to m <sup>3</sup> for aspen                                                                                                                                          |               |                                       |   |
| 30 | <sup>4</sup> ARGH Industries Ltd (n.d.), Wood converter. Retrieved from: <a href="https://www.thecalculatorsite.com/conversions/substances/wood.php">https://www.thecalculatorsite.com/conversions/substances/wood.php</a> |               |                                       |   |
