# Supplementary material
Source: MDPI journal article supplement (https://www.mdpi.com/1999-4907/10/5/447)
Supplement: s1 [file s1]

**Table S5.** Cost calculation for loader

|    | A                                                               | B                | C           |
|----|-----------------------------------------------------------------|------------------|-------------|
| 1  |                                                                 | <b>Loader</b>    |             |
| 2  | Time                                                            | <b>Base year</b> |             |
| 3  | <b>Production</b>                                               | Non-Frozen       | Frozen      |
| 4  | Annual Production (m <sup>3</sup> )                             | 750,000          | 1,400,000   |
| 5  | Days                                                            | 106              | 83          |
| 6  | Hours/Day                                                       | 21               | 19          |
| 7  | <b>Input</b>                                                    |                  |             |
| 8  | Annual Available Hours                                          | 2,226            | 1,577       |
| 9  | Utilization Percentage [42]                                     | 60               | 60          |
| 10 | Annual Production Hours                                         | 1,336            | 946         |
| 11 | Expected Life (Years) [49]                                      | 5.00             |             |
| 12 | <b>Purchase Information</b>                                     |                  |             |
| 13 | Equipment Purchase Cost (\$) [46]                               | 585,000          |             |
| 14 | Salvage Value (%) [49]                                          | 0.30             |             |
| 15 | Fuel Price (\$) [41]                                            | 175,500          |             |
| 16 | Oil Lube Costs (%) [41]                                         | 1.00             |             |
| 17 | Insurance Costs (%) [41]                                        | 0.10             |             |
| 18 | Load Factor                                                     | 0.035            |             |
| 19 | Salvage Value (\$)                                              | 0.25             |             |
| 20 | Rate of Return on Total Capital                                 | 380,250          |             |
| 21 | Average Annual Equipment Value (\$)                             | 0.10             |             |
| 22 | Fuel Consumption (lt/hr) [50]                                   | 26.00            | 28.00       |
| 23 | <b>Ownership Costs</b>                                          |                  |             |
| 24 | Depreciation (\$/year)                                          | 81,900           |             |
| 25 | Insurance (\$/year)                                             | 13,309           |             |
| 26 | Return on Capital (\$/year)                                     | 38,025           |             |
| 27 | Annual Ownership Costs (\$/year)                                | 133,234          |             |
| 28 | Total Ownership Costs (\$/year)                                 | 1,465,571        |             |
| 29 | <b>Total Ownership Unit Cost (\$/m<sup>3</sup>)</b>             | 0.68             |             |
| 30 | <b>Labor Costs</b>                                              |                  |             |
| 31 | Straight Time                                                   | 1,908            | 1,494       |
| 32 | Overtime Worked                                                 | 318              | 83          |
| 33 | Wage (\$/hr) [32]                                               | 29.29            | 29.29       |
| 34 | Overtime (\$/hr)                                                | 43.94            | 43.94       |
| 35 | Seasonal Labor Costs (\$)                                       | 69,857           | 47,406      |
| 36 | Add Employee Load (Benefits)                                    | 17,464           | 11,851      |
| 37 | Total Labour Costs (\$)                                         | 87,321           | 59,257      |
| 38 | <b>Total Labor Unit Costs (\$/m<sup>3</sup>)</b>                | 0.81             | 0.78        |
| 39 | <b>Operation Costs</b>                                          |                  |             |
| 40 | Fuel cost (\$/hr)                                               | 26.00            | 28.00       |
| 41 | Oil/Lube Cost (\$/hr)                                           | 2.60             | 2.80        |
| 42 | Fuel & Lube Cost (\$/m <sup>3</sup> )                           | 0.05             | 0.02        |
| 43 | Repair & Maintenance Costs (\$/year)                            | 65,520           |             |
| 44 | Repair & Maintenance Costs (\$/m <sup>3</sup> )                 | 0.356            |             |
| 45 | Total Operation Costs (Season)                                  | 57,213           | 44,032      |
| 46 | <b>Total Operation Unit Costs (\$/m<sup>3</sup>)</b>            | 0.53             | 0.58        |
| 47 | <b>Total Equipment Unit Costs (seasonal) (\$/m<sup>3</sup>)</b> | <b>2.02</b>      | <b>2.03</b> |
| 48 | Number of Equipments                                            | 5                | 11          |
| 49 | Prodcutivity (m <sup>3</sup> /Pmh) <sup>1</sup>                 | 95.00            | 95.00       |
| 50 | Availability (%)                                                | 0.85             | 0.85        |
| 51 | Productivity (m <sup>3</sup> /Smh)                              | 80.75            | 80.75       |
| 52 | <sup>1</sup> obtained from manufacturer                         |                  |             |
